# Supplementary material for: Enhanced interfacial interaction between modified cellulose nanocrystals and epoxidized natural rubber via ultraviolet irradiation
Source: PubMed Central journal article supplement (PMC9035154; doi:10.1038/s41598-022-10558-5), 2022-04-23
Supplement: 41598_2022_10558_MOESM1_ESM.pdf [file 41598_2022_10558_MOESM1_ESM.pdf]

## Supplementary Information

### Enhanced Interfacial Interaction between Modified Cellulose Nanocrystals and Epoxidized Natural Rubber *via* Ultraviolet Irradiation

Oranooch Somseemee<sup>1</sup>, Pongdhorn Saeoui<sup>2</sup>, Florian T. Schevenels<sup>3</sup>, and Chomsri Siriwong<sup>1,3\*</sup>

<sup>1</sup>Materials Chemistry Research Center (MCRC-KKU), Department of Chemistry and Center of Excellence for Innovation in Chemistry (PERCH-CIC), Faculty of Science, Khon Kaen University, Khon Kaen 40002, Thailand

<sup>2</sup>National Metal and Materials Technology Center (MTEC), National Science and Technology Development Agency (NSTDA), 114 Thailand Science Park, Pathum Thani 12120, Thailand

<sup>3</sup>Department of Chemistry, Faculty of Science, Khon Kaen University, Khon Kaen 40002, Thailand

(\*) Corresponding author: Chomsri Siriwong

E-mail address: [schoms@kku.ac.th](mailto:schoms@kku.ac.th) (C. Siriwong)

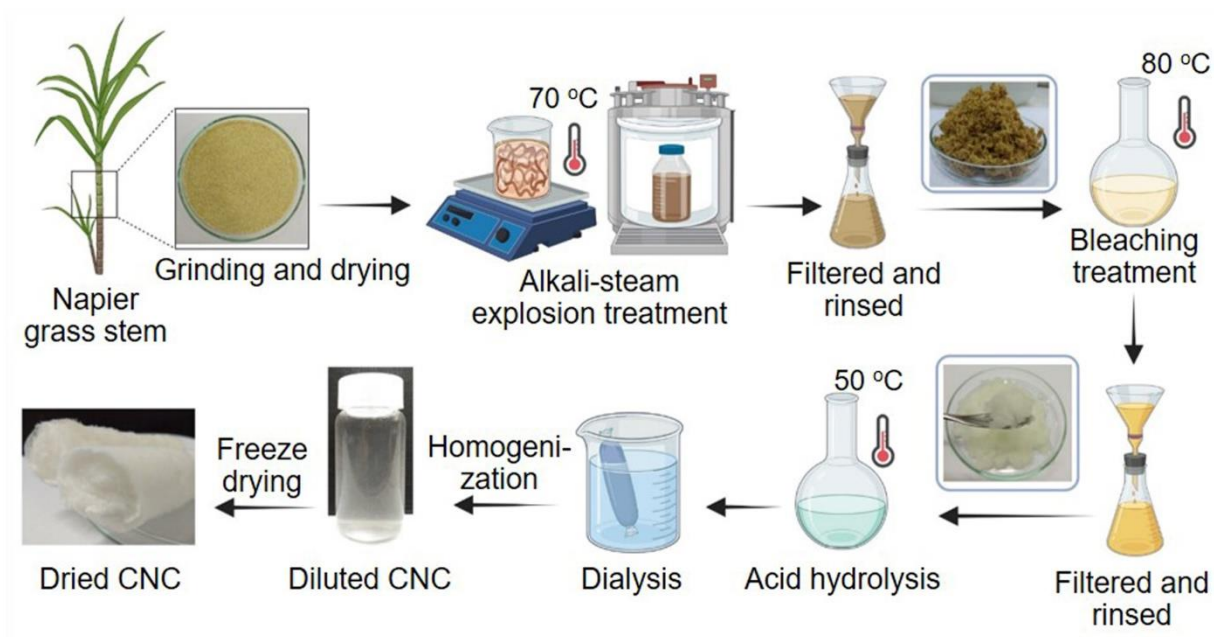

**Figure S1.** Diagram of the CNC extraction.

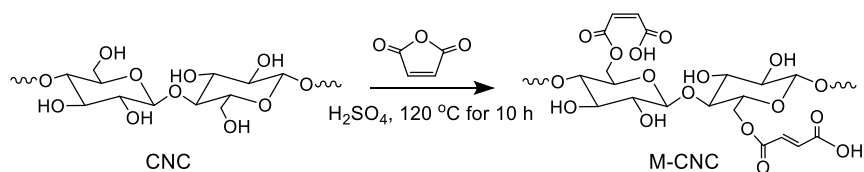

**Figure S2** The chemical reaction of MAH modified CNCs surface.

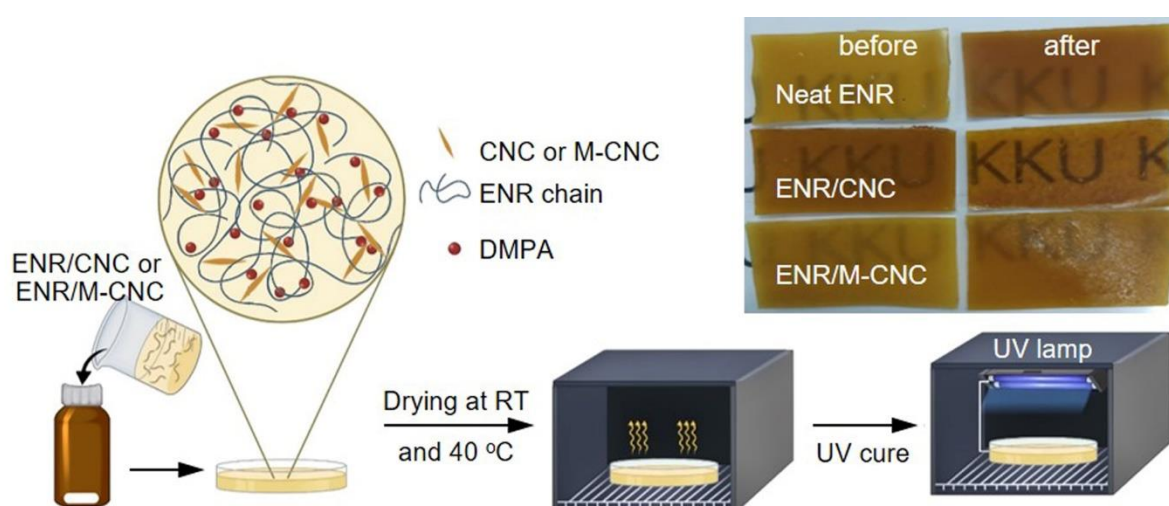

**Figure S3.** Schematic illustration of the UV-cured nanocomposite preparation.
